# Supplementary material for: Serum Periostin as a Potential Biomarker in Pediatric Patients with Primary Hypertension
Source: MDPI journal article supplement (doi:10.3390/jcm10102138), 2021-05-15
Supplement: s1 [file s1]

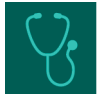

**Supplementary Table S2.** Blood pressure in the study and the control group (data presented as mean  $\pm$  standard deviation and interquartile range).

| Parameter     | Study group        | Control group     | <i>p</i> |
|---------------|--------------------|-------------------|----------|
| Office SBP    | 131.50 $\pm$ 12.36 | 117.00 $\pm$ 9.90 | <0.001   |
| [mm Hg]       | (122.00 – 140.00)  | (109.00 – 125.00) |          |
| Office SBP    | 2.30 $\pm$ 0.92    | 0.65 $\pm$ 0.86   |          |
| Z-score       | (1.68 – 2.79)      | (0.01 – 1.41)     | <0.001   |
| Office DBP    | 78.82 $\pm$ 10.50  | 66.40 $\pm$ 6.48  |          |
| [mm Hg]       | (73.00 – 83.00)    | (62.00 – 70.00)   |          |
| Office DBP    | 1.59 $\pm$ 0.85    | 0.18 $\pm$ 0.67   | <0.001   |
| Z-score       | (1.09 – 2.03)      | (−0.31 – 0.75)    |          |
| Office MAP    | 95.28 $\pm$ 10.25  | 82.30 $\pm$ 6.58  |          |
| [mm Hg]       | (87.67 – 101.33)   | (76.33 – 87.17)   | <0.001   |
| Office PP     | 52.69 $\pm$ 10.44  | 50.60 $\pm$ 7.21  |          |
| [mm Hg]       | (45.00 – 61.00)    | (45.0 – 55.0)     |          |
| ABPM SBP 24h  | 127.88 $\pm$ 8.37  | 112.95 $\pm$ 6.06 | <0.001   |
| [mm Hg]       | (121.00 – 133.00)  | (110.00 – 116.50) |          |
| ABPM DBP 24h  | 70.44 $\pm$ 6.41   | 63.20 $\pm$ 3.85  |          |
| [mm Hg]       | (66.00 – 73.00)    | (60.50 – 67.00)   | <0.001   |
| ABPM MAP 24h  | 89.48 $\pm$ 6.40   | 79.65 $\pm$ 3.54  |          |
| [mm Hg]       | (85.00 – 93.00)    | (77.00 – 82.50)   |          |
| ABPM MAP 24   | 1.16 $\pm$ 1.40    | −0.44 $\pm$ 0.66  | <0.001   |
| Z-score       | (0.17 – 1.61)      | (−0.87 – 0.08)    |          |
| ABPM PP 24h   | 57.54 $\pm$ 7.04   | 50.00 $\pm$ 6.21  |          |
| [mm Hg]       | (52.00 – 62.00)    | (46.50 – 52.50)   | <0.001   |
| ABPM HR 24h   | 78.30 $\pm$ 11.94  | 76.30 $\pm$ 12.06 |          |
| [bpm]         | (70.00 – 88.00)    | (65.00 – 85.50)   |          |
| ABPM SBPL/24h | 39.54 $\pm$ 24.51  | 9.52 $\pm$ 7.71   | <0.001   |
| [%]           | (20.00 – 57.00)    | (3.50 – 16.35)    |          |
| ABPM DBPL/24h | 22.40 $\pm$ 18.39  | 6.24 $\pm$ 4.43   |          |
| [%]           | (9.00 – 26.00)     | (1.00 – 9.50)     | <0.001   |
| ABPM SBP DIP  | 11.14 $\pm$ 5.19   | 10.30 $\pm$ 3.99  |          |
| [%]           | (7.60 – 14.10)     | (7.80 – 12.40)    |          |
| ABPM DBP DIP  | 16.58 $\pm$ 7.48   | 50.60 $\pm$ 7.21  | 0.518    |
| [%]           | (11.00 – 21.10)    | (45.00 – 55.00)   |          |
| AoSBP         | 111.03 $\pm$ 10.27 | 96.38 $\pm$ 7.80  |          |
| [mm Hg]       | (102.00 – 117.33)  | (89.83 – 102.83)  | <0.001   |
| AoDBP         | 80.84 $\pm$ 10.53  | 67.75 $\pm$ 6.43  |          |
| [mm Hg]       | (74.67 – 87.00)    | (63.00 – 71.33)   |          |
| AoMAP         | 95.48 $\pm$ 9.97   | 82.30 $\pm$ 6.58  | <0.001   |
| [mm Hg]       | (87.67 – 101.33)   | (76.33 – 87.17)   |          |
| AoPP          | 30.19 $\pm$ 6.48   | 28.63 $\pm$ 4.35  |          |
| [mm Hg]       | (25.67 – 35.33)    | (24.83 – 31.17)   | 0.328    |

SBP: systolic blood pressure; DBP: diastolic blood pressure; MAP: mean arterial pressure; PP: pulse pressure; ABPM: ambulatory blood pressure; HR: heart rate; bpm: beats per minute, SBPL: systolic blood pressure load; DBPL: diastolic blood pressure load; AoSBP: aortic (central) systolic blood pressure; AoDBP: aortic (central) diastolic blood pressure; AoMAP: aortic (central) mean blood pressure; AoPP: aortic (central) pulse pressure.
