# Supplementary material for: Serum Periostin as a Potential Biomarker in Pediatric Patients with Primary Hypertension
Source: MDPI journal article supplement (doi:10.3390/jcm10102138), 2021-05-15
Supplement: s1 [file s1]

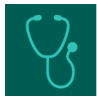

**Supplementary Table S3.** Parameters of arterial structure and function in the study and the control group (data presented as mean  $\pm$  standard deviation and interquartile range).

| Parameter              | Study group        | Control group      | <i>p</i> |
|------------------------|--------------------|--------------------|----------|
| aPWV                   | 5.17 $\pm$ 0.93    | 4.49 $\pm$ 0.72    | 0.004    |
| [m/s]                  | (4.53 – 5.70)      | (3.90 – 4.83)      |          |
| aPWV Z-score           | 0.02 $\pm$ 1.72    | −1.13 $\pm$ 1.36   | 0.009    |
|                        | (−1.54 – 1.39)     | (−2.34 – −0.11)    |          |
| AIx75HR                | −1.07 $\pm$ 13.66  | −3.77 $\pm$ 12.77  | 0.938    |
| [%]                    | (−11.00 – 5.00)    | (−9.17 – 2.17)     |          |
| Buckberg SEVR          | 161.40 $\pm$ 37.47 | 159.77 $\pm$ 30.19 | 0.815    |
| [%]                    | (133.33 – 189.00)  | (136.17 – 172.17)  |          |
| cIMT                   | 0.45 $\pm$ 0.07    | 0.39 $\pm$ 0.03    | <0.001   |
| [mm]                   | (0.40 – 0.50)      | (0.37 – 0.42)      |          |
| cIMT Z-score           | 1.30 $\pm$ 1.33    | 0.16 $\pm$ 0.57    | <0.001   |
|                        | (0.29 – 2.44)      | (−0.20 – 0.63)     |          |
| ET beta                | 4.12 $\pm$ 3.53    | 3.71 $\pm$ 0.98    | 0.576    |
|                        | (2.70 – 4.30)      | (3.15 – 4.55)      |          |
| ET Ep                  | 55.50 $\pm$ 45.74  | 44.20 $\pm$ 12.40  | 0.503    |
| [kPa]                  | (35.00 – 61.00)    | (34.50 – 53.00)    |          |
| ET AC                  | 1.20 $\pm$ 0.53    | 1.06 $\pm$ 0.33    | 0.278    |
| [mm <sup>2</sup> /kPa] | (0.91 – 1.46)      | (0.83 – 1.22)      |          |
| ET AIx                 | −2.08 $\pm$ 18.37  | −4.08 $\pm$ 7.57   | 0.432    |
| [%]                    | (−7.80 – 1.10)     | (−7.95 – −1.30)    |          |
| ET PWVbeta             | 4.22 $\pm$ 1.42    | 3.91 $\pm$ 0.55    | 0.435    |
| [m/s]                  | (3.40 – 4.70)      | (3.45 – 4.30)      |          |
| ET D max               | 6.31 $\pm$ 0.66    | 5.89 $\pm$ 0.74    | 0.023    |
| [mm]                   | (5.94 – 6.70)      | (5.25 – 6.47)      |          |
| ET D min               | 5.44 $\pm$ 0.68    | 5.07 $\pm$ 0.68    | 0.041    |
| [mm]                   | (5.04 – 5.89)      | (4.57 – 5.52)      |          |
| ET DATmax              | 133.82 $\pm$ 37.92 | 149.05 $\pm$ 48.78 | 0.219    |
| [ms]                   | (107.00 – 146.00)  | (125.50 – 149.50)  |          |

aPWV: aortic pulse wave velocity; AIx75HR: augmentation index normalized to heart rate of 75 beats per minute; SEVR: subendocardial viability ratio; cIMT: common carotid artery intima-media thickness; ET: ECHO-tracking; beta: stiffness index; Ep: pressure strain elasticity modulus; AC: arterial compliance; AIx: augmentation index; D max: maximal diameter of the right common carotid artery; D min: minimal diameter of the right common carotid artery; DATmax: acceleration time to the right common carotid artery maximal diameter.
