# Supplementary material for: Serum Periostin as a Potential Biomarker in Pediatric Patients with Primary Hypertension
Source: MDPI journal article supplement (doi:10.3390/jcm10102138), 2021-05-15
Supplement: s1 [file s1]

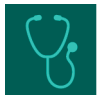

**Supplementary Table S1.** Parameters of complete blood count and parameters of calcium-phosphate metabolism of the study and the control group (data presented as mean  $\pm$  standard deviation and interquartile range).

| Parameter                           | Study group        | Control group      | <i>p</i> |
|-------------------------------------|--------------------|--------------------|----------|
| Neutrophils                         | 3.83 $\pm$ 1.85    | 2.73 $\pm$ 0.83    | 0.004    |
| [1000/ $\mu$ L]                     | (2.61 – 4.58)      | (1.86 – 3.07)      |          |
| Lymphocytes                         | 2.3 $\pm$ 0.74     | 2.16 $\pm$ 0.41    | 0.516    |
| [1000/ $\mu$ L]                     | (1.9 – 2.68)       | (1.82 – 2.55)      |          |
| Platelets                           | 237.8 $\pm$ 77.74  | 248.5 $\pm$ 46.47  | 0.179    |
| [1000/ $\mu$ L]                     | (223.0 – 324.0)    | (217 – 287.5)      |          |
| MPV                                 | 10.19 $\pm$ 1.18   | 10.91 $\pm$ 0.83   | 0.032    |
| [fL]                                | (9.7 – 11.1)       | (10.2 – 11.4)      |          |
| NLR                                 | 1.91 $\pm$ 1.44    | 1.27 $\pm$ 0.48    | 0.066    |
|                                     | (1.17 – 1.99)      | (0.89 – 1.53)      |          |
| PLR                                 | 126.61 $\pm$ 40.34 | 118.94 $\pm$ 29.28 | 0.443    |
|                                     | (98.18 – 148.56)   | (96.77 – 135.11)   |          |
| Calcium                             | 9.99 $\pm$ 0.35    | 9.77 $\pm$ 0.30    | 0.014    |
| [mg/dL]                             | (9.8 – 10.3)       | (9.6 – 10.0)       |          |
| Phosphate                           | 4.40 $\pm$ 0.70    | 4.50 $\pm$ 0.43    | 0.585    |
| [mg/dL]                             | (3.9 – 4.8)        | (4.2 – 4.8)        |          |
| Ca * P                              | 43.98 $\pm$ 7.42   | 43.85 $\pm$ 3.87   | 0.941    |
| [mg <sup>2</sup> /dL <sup>2</sup> ] | (38.61 – 48.41)    | (41.26 – 46.54)    |          |
| Parathormone [pg/mL]                | 29.43 $\pm$ 16.99  | 23.19 $\pm$ 10.14  | 0.198    |
|                                     | (16.8 – 36.4)      | (14.9 – 31.2)      |          |
| Alkaline phosphatase                | 122.26 $\pm$ 54.75 | 151.90 $\pm$ 71.19 | 0.095    |
| [IU/L]                              | (76 – 153)         | (93 – 197)         |          |
| 25(OH)D                             | 19.47 $\pm$ 8.06   | 21.71 $\pm$ 9.10   | 0.398    |
| [ng/mL]                             | (15.50 – 22.20)    | (15.75 – 25.85)    |          |

MPV: mean platelet volume; NLR: neutrophil-to-lymphocyte ratio; PLR: platelet-to-lymphocyte ratio; Ca \* P: calcium phosphate product; 25(OH)D: 25-hydroxy-vitamin D.
